# Supplementary material for: A multi-model comparison of meteorological drivers of surface ozone over Europe
Source: Copernicus journal article supplement (doi:10.5194/acp-2017-787), 2018-04-19
Supplement: Supplementary file 1 [file acp-2017-787-supplement.pdf]

## Supplementary material

### A multi-model comparison of meteorological drivers of surface ozone over Europe

Noelia Otero<sup>1,3</sup>, Jana Sillmann<sup>2</sup>, Kathleen A. Mar<sup>1</sup>, Henning W. Rust<sup>3</sup>, Sverre Solberg<sup>4</sup>, Camilla Andersson<sup>5</sup>, Magnuz Engardt<sup>5</sup>, Robert Bergström<sup>5</sup>, Bertrand Bessagnet<sup>6</sup>, Augustin Colette<sup>6</sup>, Florian Couvidat<sup>6</sup>, Courneiluis Cuvelier<sup>7</sup>, Svetlana Tsyro<sup>8</sup>, Hilde Fagerli<sup>8</sup>, Martijn Schaap<sup>9,3</sup>, Astrid Manders<sup>9</sup>, Mihaela Mircea<sup>10</sup>, Gino Briganti<sup>10</sup>, Andrea Cappelletti<sup>10</sup>, Mario Adani<sup>10</sup>, Massimo D'Isidoro<sup>10</sup>, María-Teresa Pay<sup>11</sup>, Mark Theobald<sup>12</sup>, Marta G. Vivanco<sup>12</sup>, Peter Wind<sup>8,13</sup>, Narendra Ojha<sup>14</sup>, Valentin Raffort<sup>15</sup> and Tim Butler<sup>1,3</sup>

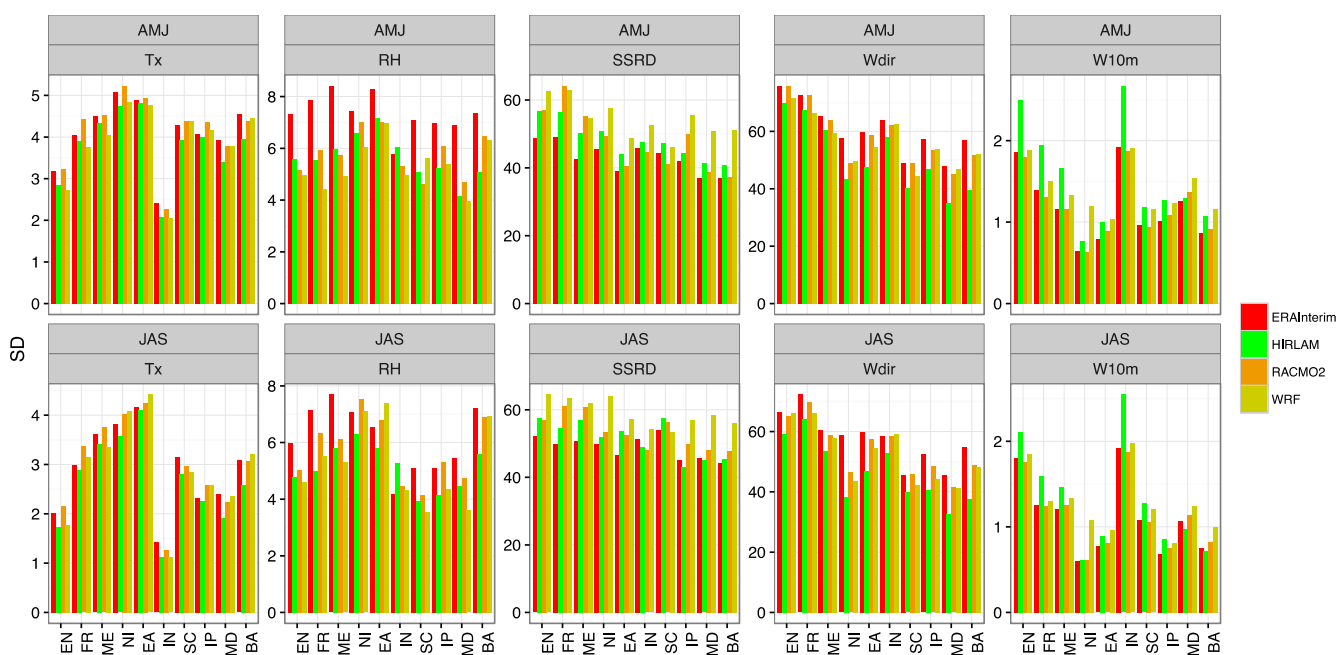

**Figure S1.** Standard deviations of the meteorological predictors: Maximum temperature (Tx), relative humidity (RH), solar radiation (SSRD), wind direction (Wdir) and wind speed-10m (W10m). Standard deviations are computed for each season, AMJ (top) and JAS (bottom), and for each region: England (EN), France (FR), Mid-EU (ME), NI (North Italy), EA (East-EU), IN (Inflow), SC (Scandinavia), IP (Iberian Peninsula), MD (Mediterranean) and Balkans (BA).

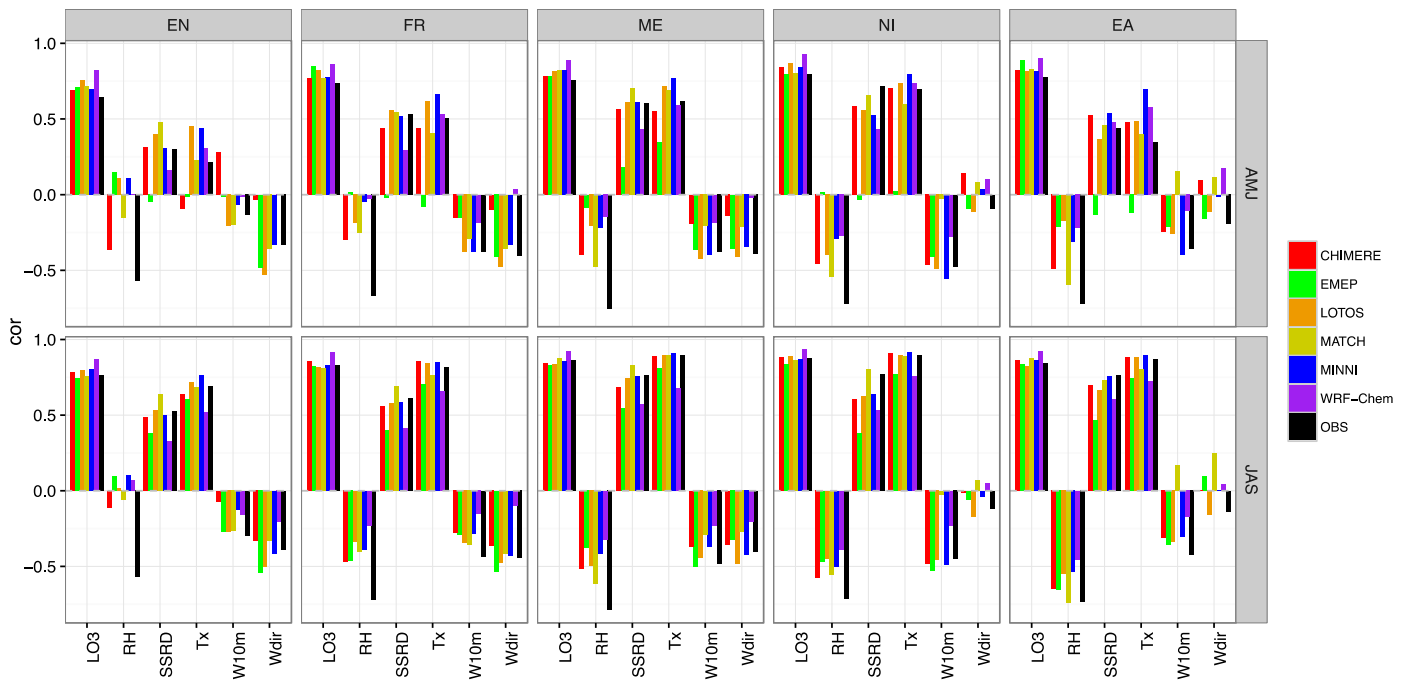

**Figure S2.** Correlation coefficients between MDA8 O<sub>3</sub> and each potential predictor used in the MLR. Correlations are computed for each season, AMJ (top) and JAS (bottom), and for internal regions: England (EN), France (FR), Mid-EU (ME), NI (North Italy), EA (East-EU).

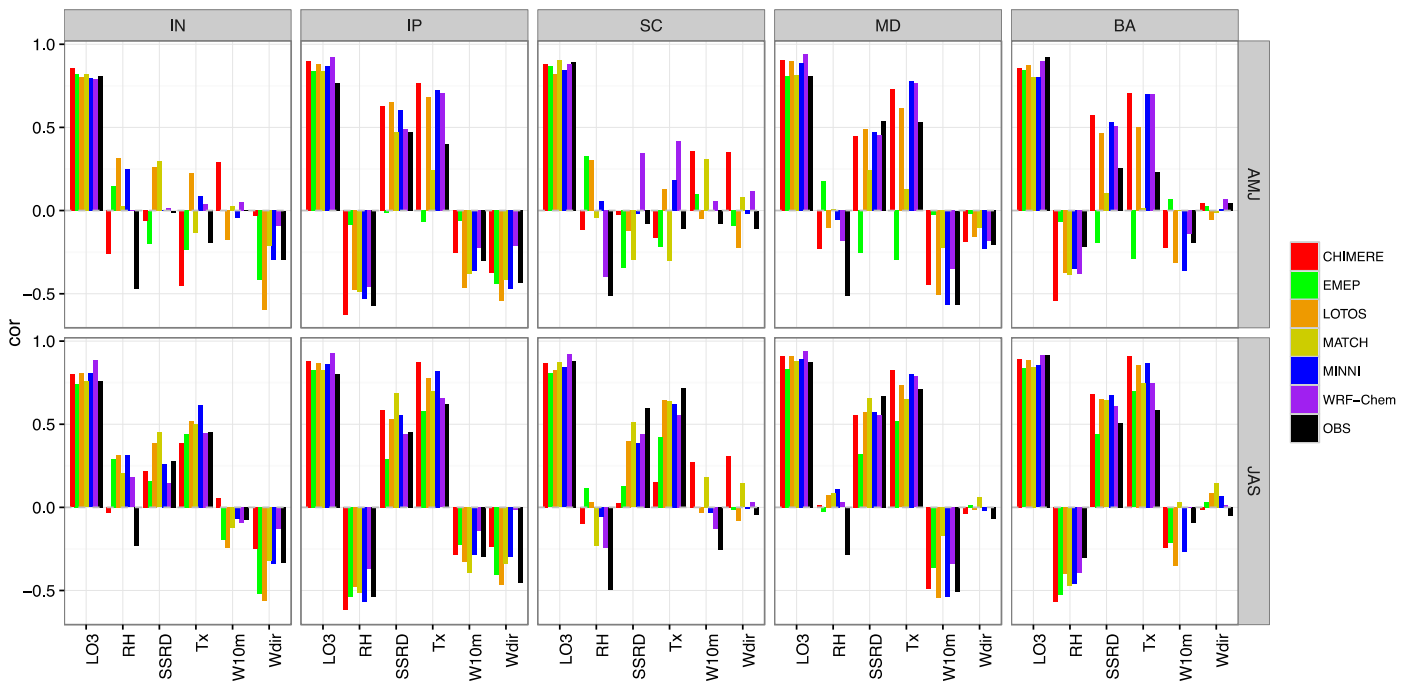

**Figure S3.** Correlation coefficients between MDA8 O<sub>3</sub> and each potential predictor used in the MLR. Correlations are computed for each season, AMJ (top) and JAS (bottom), and for external regions: IN (Inflow), SC (Scandinavia), IP (Iberian Peninsula), MD (Mediterranean) and Balkans (BA).

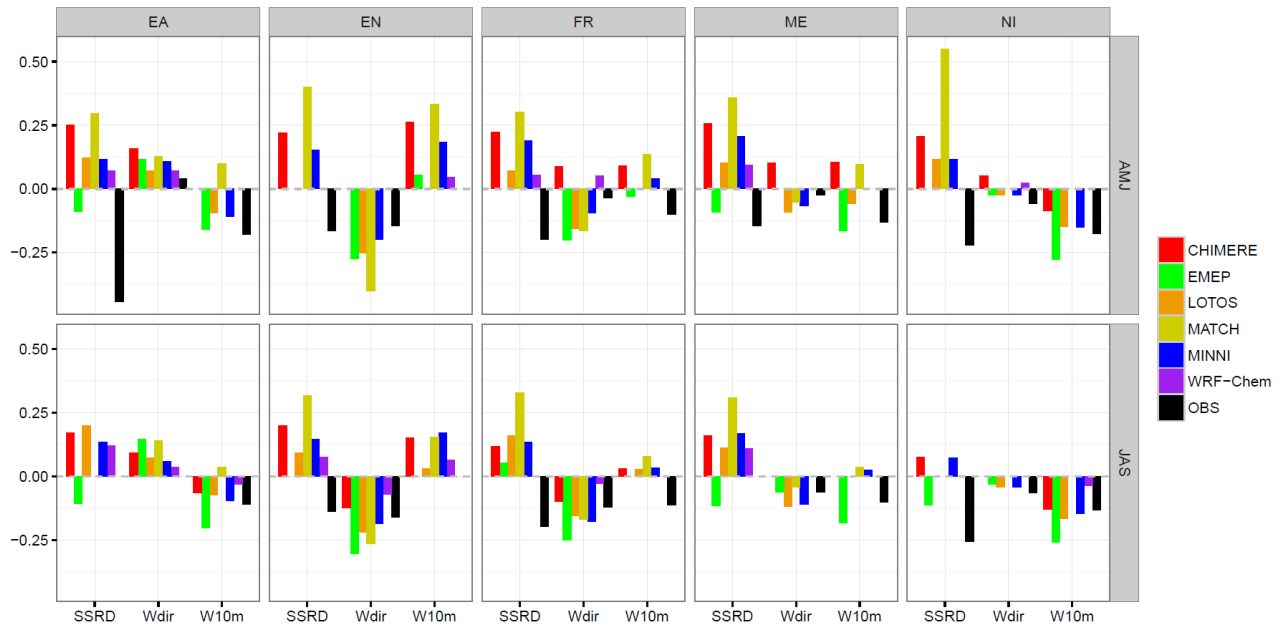

**Figure S4.** Standardised coefficients values of the rest of the meteorological predictors (SSRD, Wdir and W10m) for each CTM-based and observation-based MLR in AMJ (top) and JAS (bottom) and for the internal regions: England (EN), France (FR), Mid-Europe (ME), North Italy (NI) and East-Europe (EA).

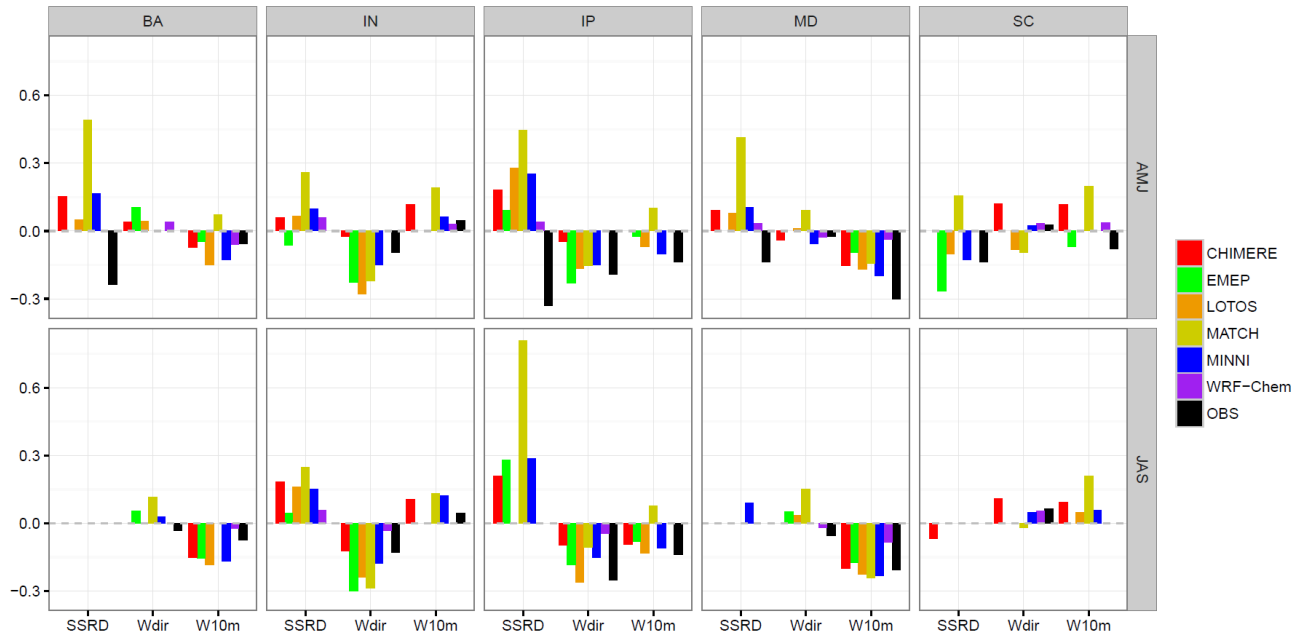

**Figure S5.** Standardised coefficients values of the rest of the meteorological predictors (SSRD, Wdir and W10m) for each CTM-based and observation-based MLR in AMJ (top) and JAS (bottom) and for the external regions: Inflow (IN), Iberian Peninsula (IP), Scandinavia (SC), Mediterranean (ME) and Balkans (BA).
