# Supplementary material for: A multi-model comparison of meteorological drivers of surface ozone over Europe
Source: Copernicus journal article supplement (doi:10.5194/acp-2017-787), 2018-04-19
Supplement: Supplementary file [file acp-2017-787-AC1-supplement.pdf]

# Authors' comment on "A multi-model comparison of meteorological drivers of surface ozone over Europe" (acp-2017-787)

## List of figures to be updated in the supplementary material

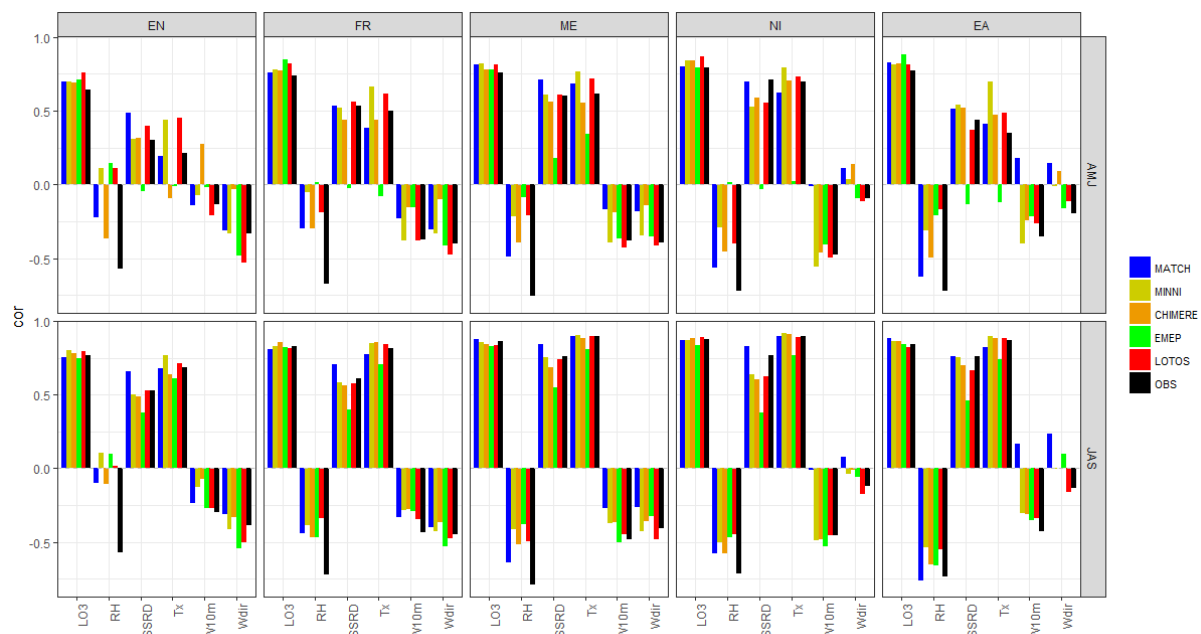

**Figure S2.** Correlation coefficients between MDA8 O<sub>3</sub> and each potential predictor used in the MLR. Correlations are computed for each season, AMJ (top) and JAS (bottom), and for internal regions: England (EN), France (FR), Mid-EU (ME), NI (North Italy), EA (East-EU).

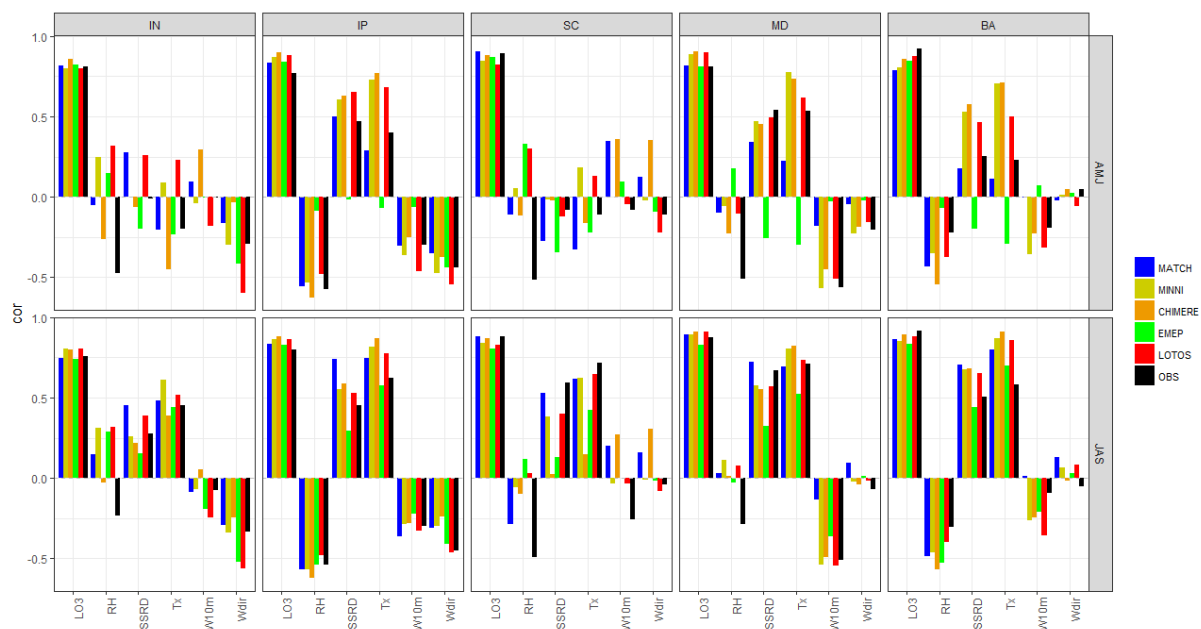

**Figure S3.** Correlation coefficients between MDA8 O<sub>3</sub> and each potential predictor used in the MLR. Correlations are computed for each season, AMJ (top) and JAS (bottom), and for external regions: IN (Inflow), SC (Scandinavia), IP (Iberian Peninsula), MD (Mediterranean) and Balkans (BA).

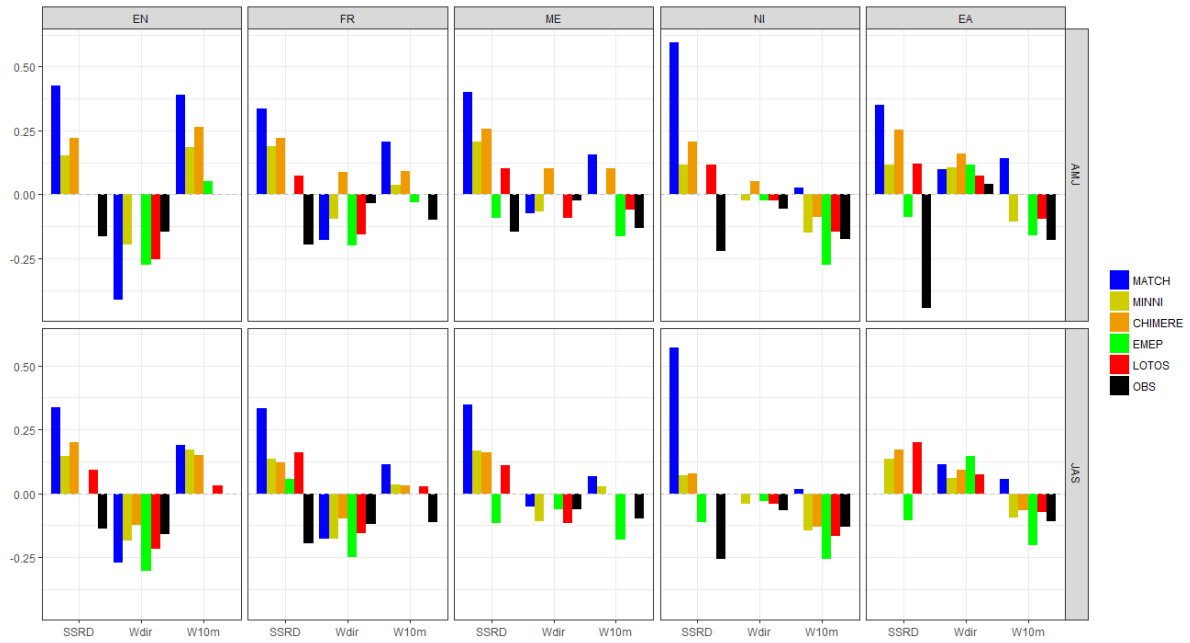

**Figure S4.** Standardised coefficients values of the rest of the meteorological predictors (SSRD, Wdir and W10m) for each CTM-based and observation-based MLR in AMJ (top) and JAS (bottom) and for the internal regions: England (EN), France (FR), Mid-Europe (ME), North Italy (NI) and East-Europe (EA).

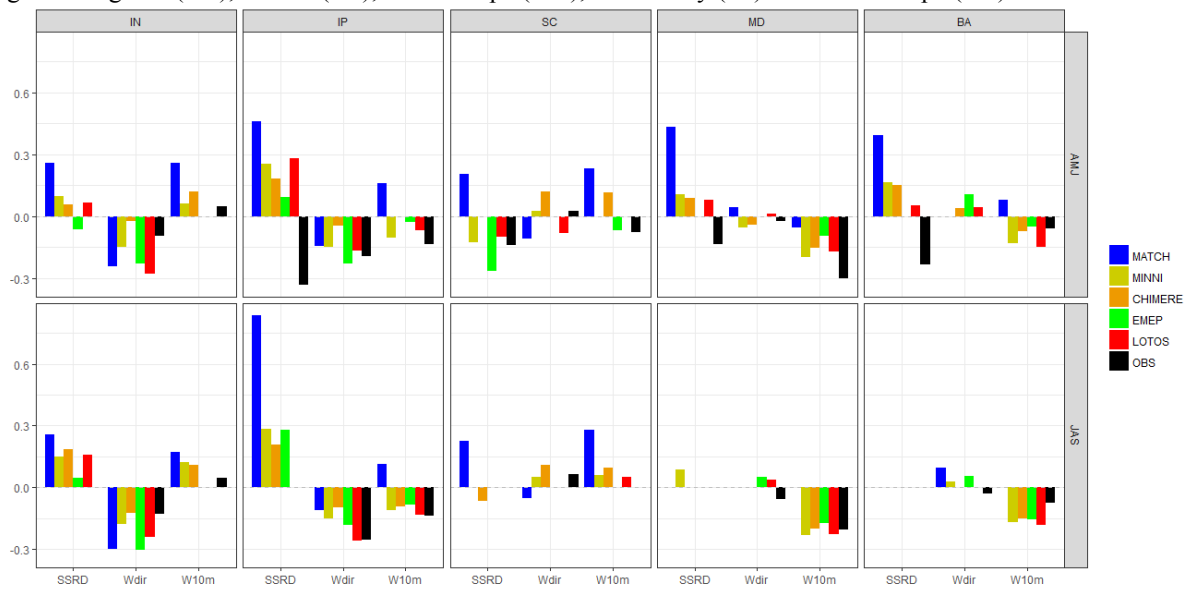

**Figure S5.** Standardised coefficients values of the rest of the meteorological predictors (SSRD, Wdir and W10m) for each CTM-based and observation-based MLR in AMJ (top) and JAS (bottom) and for the external regions: Inflow (IN), Iberian Peninsula (IP), Scandinavia (SC), Mediterranean (ME) and Balkans (BA).
